# Supplementary material
Source: publisher figshare collection journal article supplement (https://acs.figshare.com/ndownloader/files/3733789)
Supplement: Supplementary file 1 [file 3733789]

data_zach

_publ_requested_journal          'Journal name'
_publ_contact_author_name        'Klaas A. Zachariasse'
_publ_contact_author_address     
;Max-Planck-Institut f\"ur biophysikalische Chemie, 
Spektroskopie und Photochemische Kinetik
D-37070 G\"ottingen 
Germany
;
_publ_contact_author_email       kzachar@gwdg.de
_publ_contact_author_phone       49(551)201-1264
_publ_contact_author_fax         49(551)201-1501
loop_
_publ_author_name
_publ_author_address
'Sergey I. Druzhinin'
;Max-Planck-Institut f\"ur biophysikalische Chemie, 
Spektroskopie und Photochemische Kinetik
D-37070 G\"ottingen 
Germany
;
'Victor A. Galievsky'
;Max-Planck-Institut f\"ur biophysikalische Chemie, 
Spektroskopie und Photochemische Kinetik
D-37070 G\"ottingen 
Germany
;
'Attila Demeter' 
;Institute of Materials and Environmental Chemistry,
Research Centre for Natural Sciences, 
Hungarian Academy of Sciences
1519 Budapest
P.O.Box 286
Hungary
;
'Sergey A. Kovalenko'
;Institut für Chemie, Humboldt Universit\"at zu Berlin
Brook-Taylor Strasse 2,
D-12489 Berlin
Germany
;
'Tamara Senyushkina'
;Max-Planck-Institut f\"ur biophysikalische Chemie, 
Spektroskopie und Photochemische Kinetik
D-37070 G\"ottingen 
Germany
;
'Srinivas R. Dubbaka' 
;Department Chemie und Biochemie
Ludwig-Maximilians-Universit\"at
Butenandtstrasse 5-13, Haus F,
D-81377 M\"unchen
Germany
;
'Paul Knochel' 
;Department Chemie und Biochemie
Ludwig-Maximilians-Universit\"at
Butenandtstrasse 5-13, Haus F,
D-81377 M\"unchen
Germany
;
'Peter Mayer'
;Department Chemie und Biochemie
Ludwig-Maximilians-Universit\"at
Butenandtstrasse 5-13, Haus F,
D-81377 M\"unchen
Germany
;
'Gro\&se, Christian'
;Institut f\"ur Anorganische Chemie
Georg-August Universit\"at
Tammannstrasse 4
D-37077 G\"ottingen
Germany
;
'Dietmar Stalke'
;Institut f\"ur Anorganische Chemie
Georg-August Universit\"at
Tammannstrasse 4
D-37077 G\"ottingen
Germany
;
'Klaas A. Zachariasse'
;Max-Planck-Institut f\"ur biophysikalische Chemie, 
Spektroskopie und Photochemische Kinetik
D-37070 G\"ottingen 
Germany
;

_publ_section_title              
;
Two-State Intramolecular Charge Transfer (ICT) with 
3,5-Dimethyl-4-(Dimethylamino)benzonitrile (MMD) and Its Meta-Isomer 
mMMD. Ground State Amino Twist Not Essential for ICT.
;

_audit_creation_method           SHELXL-97
_chemical_name_systematic        4-(di-tert-butylamino)benzonitrile
_chemical_name_common            DTABN
_chemical_melting_point          ?
_chemical_formula_moiety         'C15 H22 N2'
_chemical_formula_sum            'C15 H22 N2'
_chemical_formula_weight         230.35

loop_
_atom_type_symbol
_atom_type_description
_atom_type_scat_dispersion_real
_atom_type_scat_dispersion_imag
_atom_type_scat_source
C C 0.0181 0.0091 'International Tables Vol C Tables 4.2.6.8 and 6.1.1.4'
H H 0.0000 0.0000 'International Tables Vol C Tables 4.2.6.8 and 6.1.1.4'
N N 0.0311 0.0180 'International Tables Vol C Tables 4.2.6.8 and 6.1.1.4'

_symmetry_cell_setting           monoclinic
_symmetry_space_group_name_H-M   'P 21'
_symmetry_int_tables_number      4

loop_
_symmetry_equiv_pos_as_xyz
'x, y, z'
'-x, y+1/2, -z'

_cell_length_a                   8.4033(17)
_cell_length_b                   8.2068(16)
_cell_length_c                   10.092(2)
_cell_angle_alpha                90.00
_cell_angle_beta                 92.33(3)
_cell_angle_gamma                90.00
_cell_volume                     695.4(2)
_cell_formula_units_Z            2
_cell_measurement_temperature    100(2)
_cell_measurement_reflns_used    7508
_cell_measurement_theta_min      4.3845
_cell_measurement_theta_max      64.2225

_exptl_crystal_description       block
_exptl_crystal_colour            colorless
_exptl_crystal_size_max          0.20
_exptl_crystal_size_mid          0.20
_exptl_crystal_size_min          0.20
_exptl_crystal_density_meas      ?
_exptl_crystal_density_diffrn    1.100
_exptl_crystal_density_method    'not measured'
_exptl_crystal_F_000             252
_exptl_absorpt_coefficient_mu    0.491
_exptl_absorpt_correction_type   multi-scan
_exptl_absorpt_correction_T_min  0.9081
_exptl_absorpt_correction_T_max  0.9081
_exptl_absorpt_process_details   sadabs

_exptl_special_details           
; 
 Intensities were measured with a SMART 6000 area detector 
;

_diffrn_ambient_temperature      100(2)
_diffrn_radiation_probe          x-ray
_diffrn_radiation_type           CuK\a
_diffrn_radiation_wavelength     1.54178
_diffrn_source                   'rotating anode'
_diffrn_source_type              'Bruker AXS'
_diffrn_radiation_monochromator  'IMCOATEC multilayer optics'
_diffrn_measurement_device_type  'Bruker three circle diffractometer'
_diffrn_measurement_method       'omega scan'
_diffrn_detector_area_resol_mean 5.602
_diffrn_standards_number         0
_diffrn_standards_interval_count 0
_diffrn_standards_interval_time  0
_diffrn_standards_decay_%        0
_diffrn_reflns_number            7623
_diffrn_reflns_av_R_equivalents  0.0195
_diffrn_reflns_av_sigmaI/netI    0.0183
_diffrn_reflns_limit_h_min       -9
_diffrn_reflns_limit_h_max       9
_diffrn_reflns_limit_k_min       -9
_diffrn_reflns_limit_k_max       9
_diffrn_reflns_limit_l_min       -11
_diffrn_reflns_limit_l_max       11
_diffrn_reflns_theta_min         4.38
_diffrn_reflns_theta_max         64.57
_reflns_number_total             2062
_reflns_number_gt                2039
_reflns_threshold_expression     >2sigma(I)

_computing_data_collection       'Proteum2 (v 2.2-RC7, Bruker 2006)'
_computing_cell_refinement       'Bruker AXS SAINT (v 7.40A, Bruker 2006)'
_computing_data_reduction        'Bruker AXS SAINT (v 7.40A, Bruker 2006)'
_computing_structure_solution    'SHELXS-97 (Sheldrick, 1990)'
_computing_structure_refinement  'SHELXL-97 (Sheldrick, 1997)'
_computing_molecular_graphics    'Bruker AXS SHELXTL (v 6.12)'
_computing_publication_material  'SHELXL-97 (Sheldrick, 1997)'

_refine_special_details          
; 
 Refinement of F^2^ against ALL reflections.  The weighted R-factor wR and 
 goodness of fit S are based on F^2^, conventional R-factors R are based 
 on F, with F set to zero for negative F^2^. The threshold expression of 
 F^2^ > 2sigma(F^2^) is used only for calculating R-factors(gt) etc. and is 
 not relevant to the choice of reflections for refinement.  R-factors based 
 on F^2^ are statistically about twice as large as those based on F, and R- 
 factors based on ALL data will be even larger. 
;

_refine_ls_structure_factor_coef Fsqd
_refine_ls_matrix_type           full
_refine_ls_weighting_scheme      calc
_refine_ls_weighting_details     
'calc w=1/[\s^2^(Fo^2^)+(0.0496P)^2^+0.1018P] where P=(Fo^2^+2Fc^2^)/3'
_atom_sites_solution_primary     direct
_atom_sites_solution_secondary   difmap
_atom_sites_solution_hydrogens   geom
_refine_ls_hydrogen_treatment    constr
_refine_ls_extinction_method     none
_refine_ls_extinction_coef       ?
_refine_ls_abs_structure_details 
;Flack H D (1983), Acta Cryst. A39, 876-881.

The Flack x parameter was calculated by SHELXL to 0.4(0.4). A new recalculation
with Parsons' Q-values algorithm implimented in XPREP was carried out and gave
the following values: Correlation coefficient   6.16,   GooF  1.1931,   
Flack x  0.1194 (  0.1527 ).
;
_refine_ls_abs_structure_Flack   0.12(15)
_refine_ls_number_reflns         2062
_refine_ls_number_parameters     160
_refine_ls_number_restraints     146
_refine_ls_R_factor_all          0.0297
_refine_ls_R_factor_gt           0.0294
_refine_ls_wR_factor_ref         0.0770
_refine_ls_wR_factor_gt          0.0768
_refine_ls_goodness_of_fit_ref   1.026
_refine_ls_restrained_S_all      0.989
_refine_ls_shift/su_max          0.000
_refine_ls_shift/su_mean         0.000

loop_
_atom_site_label
_atom_site_type_symbol
_atom_site_fract_x
_atom_site_fract_y
_atom_site_fract_z
_atom_site_U_iso_or_equiv
_atom_site_adp_type
_atom_site_occupancy
_atom_site_symmetry_multiplicity
_atom_site_calc_flag
_atom_site_refinement_flags
_atom_site_disorder_assembly
_atom_site_disorder_group
N9 N 0.10584(12) 0.32852(13) 0.21056(10) 0.0228(2) Uani 1 1 d U . .
C7 C 0.57266(15) 0.82404(18) 0.28890(13) 0.0281(3) Uani 1 1 d U . .
C2 C 0.27939(16) 0.49964(17) 0.36164(13) 0.0256(3) Uani 1 1 d U . .
H2 H 0.2373 0.4481 0.4369 0.038 Uiso 1 1 calc R . .
C14 C 0.17474(15) 0.15953(17) 0.22200(13) 0.0253(3) Uani 1 1 d U . .
C5 C 0.40387(15) 0.65020(17) 0.14247(13) 0.0266(3) Uani 1 1 d U . .
H5 H 0.4464 0.7014 0.0673 0.040 Uiso 1 1 calc R . .
N8 N 0.66553(14) 0.92629(16) 0.30617(13) 0.0362(3) Uani 1 1 d U . .
C4 C 0.45579(15) 0.69628(17) 0.26984(13) 0.0255(3) Uani 1 1 d U . .
C3 C 0.39309(15) 0.62062(17) 0.37979(13) 0.0267(3) Uani 1 1 d U . .
H3 H 0.4282 0.6519 0.4668 0.040 Uiso 1 1 calc R . .
C6 C 0.28956(15) 0.52883(16) 0.12617(12) 0.0245(3) Uani 1 1 d U . .
H6 H 0.2544 0.4977 0.0392 0.037 Uiso 1 1 calc R . .
C1 C 0.22548(14) 0.45198(16) 0.23451(12) 0.0234(3) Uani 1 1 d U . .
C16 C 0.24866(17) 0.11875(18) 0.36000(14) 0.0322(3) Uani 1 1 d U . .
H16B H 0.1689 0.1346 0.4270 0.048 Uiso 1 1 calc R . .
H16C H 0.3398 0.1906 0.3794 0.048 Uiso 1 1 calc R . .
H16A H 0.2844 0.0051 0.3615 0.048 Uiso 1 1 calc R . .
C15 C 0.30812(16) 0.14720(18) 0.12213(14) 0.0294(3) Uani 1 1 d U . .
H15B H 0.3475 0.0349 0.1197 0.044 Uiso 1 1 calc R . .
H15C H 0.3956 0.2203 0.1494 0.044 Uiso 1 1 calc R . .
H15A H 0.2661 0.1785 0.0338 0.044 Uiso 1 1 calc R . .
C17 C 0.05272(17) 0.02793(18) 0.18314(15) 0.0309(3) Uani 1 1 d U . .
H17A H 0.0079 0.0501 0.0938 0.046 Uiso 1 1 calc R . .
H17C H -0.0328 0.0282 0.2463 0.046 Uiso 1 1 calc R . .
H17B H 0.1049 -0.0789 0.1844 0.046 Uiso 1 1 calc R . .
C13 C -0.18666(15) 0.30847(19) 0.15771(14) 0.0304(3) Uani 1 1 d U . .
H13B H -0.1548 0.3308 0.0672 0.046 Uiso 1 1 calc R . .
H13C H -0.2879 0.3633 0.1730 0.046 Uiso 1 1 calc R . .
H13A H -0.1995 0.1907 0.1696 0.046 Uiso 1 1 calc R . .
C11 C -0.09455(16) 0.31208(19) 0.39686(13) 0.0306(3) Uani 1 1 d U . .
H11B H -0.2021 0.3465 0.4185 0.046 Uiso 1 1 calc R . .
H11C H -0.0171 0.3585 0.4615 0.046 Uiso 1 1 calc R . .
H11A H -0.0879 0.1929 0.3996 0.046 Uiso 1 1 calc R . .
C12 C -0.07440(16) 0.55893(18) 0.25544(15) 0.0306(3) Uani 1 1 d U . .
H12A H -0.0472 0.6005 0.1682 0.046 Uiso 1 1 calc R . .
H12C H -0.0022 0.6063 0.3237 0.046 Uiso 1 1 calc R . .
H12B H -0.1844 0.5889 0.2732 0.046 Uiso 1 1 calc R . .
C10 C -0.05778(15) 0.37220(17) 0.25725(13) 0.0259(3) Uani 1 1 d U . .

loop_
_atom_site_aniso_label
_atom_site_aniso_U_11
_atom_site_aniso_U_22
_atom_site_aniso_U_33
_atom_site_aniso_U_23
_atom_site_aniso_U_13
_atom_site_aniso_U_12
N9 0.0200(5) 0.0193(6) 0.0291(5) -0.0004(5) 0.0015(4) -0.0001(5)
C7 0.0227(6) 0.0232(7) 0.0385(7) -0.0004(6) 0.0021(5) 0.0010(6)
C2 0.0251(6) 0.0241(7) 0.0276(6) 0.0014(5) 0.0008(5) -0.0002(5)
C14 0.0232(6) 0.0210(7) 0.0317(7) -0.0004(5) 0.0017(5) -0.0004(5)
C5 0.0241(6) 0.0247(7) 0.0312(7) 0.0036(6) 0.0037(5) 0.0020(5)
N8 0.0304(7) 0.0302(7) 0.0480(7) -0.0012(5) 0.0015(5) -0.0044(5)
C4 0.0186(6) 0.0199(6) 0.0379(7) -0.0009(6) -0.0001(5) 0.0024(5)
C3 0.0237(6) 0.0263(8) 0.0300(6) -0.0027(6) -0.0020(5) -0.0004(5)
C6 0.0231(7) 0.0232(7) 0.0273(6) -0.0002(5) 0.0001(5) 0.0028(5)
C1 0.0201(6) 0.0204(7) 0.0295(6) -0.0007(6) -0.0006(5) 0.0035(5)
C16 0.0358(8) 0.0262(8) 0.0346(7) 0.0041(6) 0.0003(6) 0.0069(6)
C15 0.0266(7) 0.0251(7) 0.0368(7) -0.0023(6) 0.0037(5) 0.0018(6)
C17 0.0301(7) 0.0217(7) 0.0413(7) -0.0042(6) 0.0048(6) -0.0024(6)
C13 0.0231(6) 0.0273(7) 0.0406(7) -0.0005(6) -0.0008(5) -0.0008(6)
C11 0.0284(7) 0.0298(7) 0.0341(7) -0.0034(6) 0.0075(5) 0.0000(6)
C12 0.0243(7) 0.0236(8) 0.0438(8) -0.0028(6) 0.0001(6) 0.0027(5)
C10 0.0212(6) 0.0231(7) 0.0335(7) -0.0026(5) 0.0027(5) 0.0007(5)

_geom_special_details            
; 
 All esds (except the esd in the dihedral angle between two l.s. planes) 
 are estimated using the full covariance matrix.  The cell esds are taken 
 into account individually in the estimation of esds in distances, angles 
 and torsion angles; correlations between esds in cell parameters are only 
 used when they are defined by crystal symmetry.  An approximate (isotropic) 
 treatment of cell esds is used for estimating esds involving l.s. planes. 
;

loop_
_geom_bond_atom_site_label_1
_geom_bond_atom_site_label_2
_geom_bond_distance
_geom_bond_site_symmetry_2
_geom_bond_publ_flag
N9 C1 1.4408(16) . ?
N9 C14 1.5055(18) . ?
N9 C10 1.5145(16) . ?
C7 N8 1.1543(19) . ?
C7 C4 1.4442(19) . ?
C2 C3 1.3849(19) . ?
C2 C1 1.3990(18) . ?
C2 H2 0.9500 . ?
C14 C17 1.5294(19) . ?
C14 C16 1.5386(19) . ?
C14 C15 1.5408(19) . ?
C5 C6 1.3889(19) . ?
C5 C4 1.3929(19) . ?
C5 H5 0.9500 . ?
C4 C3 1.3936(19) . ?
C3 H3 0.9500 . ?
C6 C1 1.3897(19) . ?
C6 H6 0.9500 . ?
C16 H16B 0.9800 . ?
C16 H16C 0.9800 . ?
C16 H16A 0.9800 . ?
C15 H15B 0.9800 . ?
C15 H15C 0.9800 . ?
C15 H15A 0.9800 . ?
C17 H17A 0.9800 . ?
C17 H17C 0.9800 . ?
C17 H17B 0.9800 . ?
C13 C10 1.539(2) . ?
C13 H13B 0.9800 . ?
C13 H13C 0.9800 . ?
C13 H13A 0.9800 . ?
C11 C10 1.5361(18) . ?
C11 H11B 0.9800 . ?
C11 H11C 0.9800 . ?
C11 H11A 0.9800 . ?
C12 C10 1.5389(19) . ?
C12 H12A 0.9800 . ?
C12 H12C 0.9800 . ?
C12 H12B 0.9800 . ?

loop_
_geom_angle_atom_site_label_1
_geom_angle_atom_site_label_2
_geom_angle_atom_site_label_3
_geom_angle
_geom_angle_site_symmetry_1
_geom_angle_site_symmetry_3
_geom_angle_publ_flag
C1 N9 C14 111.80(9) . . ?
C1 N9 C10 114.68(10) . . ?
C14 N9 C10 123.05(10) . . ?
N8 C7 C4 178.95(14) . . ?
C3 C2 C1 121.18(12) . . ?
C3 C2 H2 119.4 . . ?
C1 C2 H2 119.4 . . ?
N9 C14 C17 112.28(10) . . ?
N9 C14 C16 114.19(11) . . ?
C17 C14 C16 108.68(11) . . ?
N9 C14 C15 107.34(10) . . ?
C17 C14 C15 106.49(11) . . ?
C16 C14 C15 107.47(11) . . ?
C6 C5 C4 119.55(12) . . ?
C6 C5 H5 120.2 . . ?
C4 C5 H5 120.2 . . ?
C3 C4 C5 119.97(12) . . ?
C3 C4 C7 119.63(12) . . ?
C5 C4 C7 120.39(12) . . ?
C2 C3 C4 119.68(12) . . ?
C2 C3 H3 120.2 . . ?
C4 C3 H3 120.2 . . ?
C5 C6 C1 121.37(12) . . ?
C5 C6 H6 119.3 . . ?
C1 C6 H6 119.3 . . ?
C6 C1 C2 118.25(12) . . ?
C6 C1 N9 118.50(11) . . ?
C2 C1 N9 123.25(11) . . ?
C14 C16 H16B 109.5 . . ?
C14 C16 H16C 109.5 . . ?
H16B C16 H16C 109.5 . . ?
C14 C16 H16A 109.5 . . ?
H16B C16 H16A 109.5 . . ?
H16C C16 H16A 109.5 . . ?
C14 C15 H15B 109.5 . . ?
C14 C15 H15C 109.5 . . ?
H15B C15 H15C 109.5 . . ?
C14 C15 H15A 109.5 . . ?
H15B C15 H15A 109.5 . . ?
H15C C15 H15A 109.5 . . ?
C14 C17 H17A 109.5 . . ?
C14 C17 H17C 109.5 . . ?
H17A C17 H17C 109.5 . . ?
C14 C17 H17B 109.5 . . ?
H17A C17 H17B 109.5 . . ?
H17C C17 H17B 109.5 . . ?
C10 C13 H13B 109.5 . . ?
C10 C13 H13C 109.5 . . ?
H13B C13 H13C 109.5 . . ?
C10 C13 H13A 109.5 . . ?
H13B C13 H13A 109.5 . . ?
H13C C13 H13A 109.5 . . ?
C10 C11 H11B 109.5 . . ?
C10 C11 H11C 109.5 . . ?
H11B C11 H11C 109.5 . . ?
C10 C11 H11A 109.5 . . ?
H11B C11 H11A 109.5 . . ?
H11C C11 H11A 109.5 . . ?
C10 C12 H12A 109.5 . . ?
C10 C12 H12C 109.5 . . ?
H12A C12 H12C 109.5 . . ?
C10 C12 H12B 109.5 . . ?
H12A C12 H12B 109.5 . . ?
H12C C12 H12B 109.5 . . ?
N9 C10 C11 115.37(11) . . ?
N9 C10 C13 109.89(10) . . ?
C11 C10 C13 109.10(11) . . ?
N9 C10 C12 108.36(10) . . ?
C11 C10 C12 108.01(12) . . ?
C13 C10 C12 105.64(11) . . ?

loop_
_geom_torsion_atom_site_label_1
_geom_torsion_atom_site_label_2
_geom_torsion_atom_site_label_3
_geom_torsion_atom_site_label_4
_geom_torsion
_geom_torsion_site_symmetry_1
_geom_torsion_site_symmetry_2
_geom_torsion_site_symmetry_3
_geom_torsion_site_symmetry_4
_geom_torsion_publ_flag
C1 N9 C14 C17 -174.22(11) . . . . ?
C10 N9 C14 C17 42.98(15) . . . . ?
C1 N9 C14 C16 61.48(13) . . . . ?
C10 N9 C14 C16 -81.32(14) . . . . ?
C1 N9 C14 C15 -57.53(13) . . . . ?
C10 N9 C14 C15 159.67(11) . . . . ?
C6 C5 C4 C3 0.03(19) . . . . ?
C6 C5 C4 C7 -178.99(12) . . . . ?
N8 C7 C4 C3 -13(8) . . . . ?
N8 C7 C4 C5 166(8) . . . . ?
C1 C2 C3 C4 -0.24(19) . . . . ?
C5 C4 C3 C2 0.09(19) . . . . ?
C7 C4 C3 C2 179.12(12) . . . . ?
C4 C5 C6 C1 0.01(19) . . . . ?
C5 C6 C1 C2 -0.16(19) . . . . ?
C5 C6 C1 N9 179.22(11) . . . . ?
C3 C2 C1 C6 0.28(19) . . . . ?
C3 C2 C1 N9 -179.07(12) . . . . ?
C14 N9 C1 C6 99.96(13) . . . . ?
C10 N9 C1 C6 -113.93(13) . . . . ?
C14 N9 C1 C2 -80.69(14) . . . . ?
C10 N9 C1 C2 65.42(15) . . . . ?
C1 N9 C10 C11 -94.06(14) . . . . ?
C14 N9 C10 C11 47.80(16) . . . . ?
C1 N9 C10 C13 142.12(11) . . . . ?
C14 N9 C10 C13 -76.03(14) . . . . ?
C1 N9 C10 C12 27.14(15) . . . . ?
C14 N9 C10 C12 168.99(11) . . . . ?

_diffrn_measured_fraction_theta_max 0.985
_diffrn_reflns_theta_full        64.57
_diffrn_measured_fraction_theta_full 0.985
_refine_diff_density_max         0.148
_refine_diff_density_min         -0.132
_refine_diff_density_rms         0.035
_exptl_crystal_recrystallization_method 'at 188K, in toluene'

# start Validation Reply Form
_vrf_THETM01_zach
;
PROBLEM: The value of sine(theta_max)/wavelength is less than 0.590
RESPONSE: Data were collected using Cu radiation. Highest resolution 
of collected data were used for structrure refinement. 
The final value of sine(theta_max)/wavelength is 0.5858 and close to 0.590.
;
# end Validation Reply Form
